# Supplementary material
Source: Research Square preprint supplement (doi:10.21203/rs.3.rs-9069493/v1)
Supplement: Supplementary file 1 [file 81ff203fad123ce00b5eff4d.docx]

pkgs <- c("tidyverse","forecast","tseries","mgcv","RColorBrewer","gridExtra","broom","lmtest","readr","scoringRules","readxl","mice","msm","survival")

new <- pkgs[!pkgs %in% installed.packages()[,"Package"]]

if(length(new)) install.packages(new, dependencies = TRUE)

library(tidyverse)

library(forecast)

library(tseries)

library(mgcv)

library(RColorBrewer)

library(gridExtra)

library(broom)

library(lmtest)

library(readr)

# scoringRules used for CRPS approximation

if(requireNamespace("scoringRules", quietly = TRUE)) library(scoringRules)

# optional heavy packages

bsts_available <- requireNamespace("bsts", quietly = TRUE)

dlm_available <- requireNamespace("dlm", quietly = TRUE)

brms_available <- requireNamespace("brms", quietly = TRUE)

if (!bsts_available) message("Package 'bsts' not installed - BSTS will be skipped unless installed.")

if (!dlm_available) message("Package 'dlm' not installed - DLM will be skipped unless installed.")

if (!brms_available) message("Package 'brms' not installed - brms Bayesian models will be skipped unless installed.")

if (brms_available) {

library(brms)

options(mc.cores = parallel::detectCores())

}

if (bsts_available) library(bsts)

if (dlm_available) library(dlm)

# -----------------------

# User options

# -----------------------

run_brms <- brms_available # enable brms if installed

show_ci <- TRUE # whether to plot ribbons for model CIs when available

forecast_horizon <- 2040

brms_iter <- 2000

brms_chains <- 4

# Theta bootstrap options

theta_boot_B <- 2000 # number of bootstrap draws for Theta CI (reduce for speed if needed)

theta_boot_seed <- 123 # RNG seed for reproducibility

# Rolling-origin options

initial_window <- 10 # training size for first fold in years

perform_heavy_rolling <- TRUE # include brms/bsts/dlm in rolling refit if TRUE

rolling_verbose <- TRUE

# CRPS options

crps_draws <- 2000 # number of draws used to approximate predictive distribution

# -----------------------

# Data

# -----------------------

# Default example data (replace with your real data load if needed)

data <- tibble(

Year = 2000:2022,

Rate = c(8.762, 8.447, 8.318, 8.143, 8.144, 7.787, 7.658, 7.490, 7.281, 7.237,

6.818, 6.434, 6.434, 6.120, 6.034, 5.856, 5.577, 5.616, 5.422, 5.188,

4.678, 4.640, 4.482)

)

data <- data %>% mutate(LogRate = log(Rate), year_c = Year - min(Year))

# ts object on LOG scale

start_year <- min(data$Year)

frequency_guess <- forecast::findfrequency(ts(data$LogRate, start = start_year))

message("Detected frequency (findfrequency) on log scale: ", frequency_guess)

ts_log_rate <- ts(data$LogRate, start = start_year, frequency = frequency_guess)

# -----------------------

# Diagnostics (on log scale)

# -----------------------

p_series <- ggplot(data, aes(x = Year, y = Rate)) +

geom_line() + geom_point() + theme_minimal() +

ggtitle("Observed Rate (2000-2022) - original scale")

p_trend <- p_series +

geom_smooth(aes(x = Year, y = Rate), method = "lm", se = FALSE, color = "darkblue", linetype = "dashed") +

geom_smooth(aes(x = Year, y = Rate), method = "loess", se = FALSE, color = "red")

spec.pgram(as.numeric(ts_log_rate), log="no", main="Periodogram (log Rate)")

par(mfrow = c(1,2))

Acf(ts_log_rate, main = "ACF of log(Rate)")

Pacf(ts_log_rate, main = "PACF of log(Rate)")

par(mfrow = c(1,1))

cat("\n=== Stationarity tests (log scale) ===\n")

print(adf.test(as.numeric(ts_log_rate)))

print(kpss.test(as.numeric(ts_log_rate)))

cat("\nSuggested differences (ADF): ", ndiffs(ts_log_rate), "\n")

n <- nrow(data)

actuals_rate <- data$Rate

# small reusable RMSE

rmse_fun <- function(actual, pred) sqrt(mean((actual - pred)^2, na.rm = TRUE))

# -----------------------

# Full-sample fits (log scale)

# -----------------------

# ARIMA

fit_arima <- tryCatch(auto.arima(ts_log_rate, seasonal = (frequency_guess > 1)), error = function(e) { message("ARIMA failed: ", e$message); NULL })

# ETS

fit_ets <- tryCatch(ets(ts_log_rate), error = function(e) { message("ETS failed: ", e$message); NULL })

# Frequentist GAM (mgcv)

fit_gam <- tryCatch(gam(LogRate ~ s(year_c, k = 8), data = data, method = "REML"), error = function(e) { message("GAM failed: ", e$message); NULL })

# Theta - placeholder; Theta in-sample handled by rolling loop for fair comparison

# brms GAM (full-sample) - optional

brms_mean <- brms_lo <- brms_hi <- brms_fitted_mean <- NULL

if (run_brms) {

message("Fitting brms GAM (may be slow)...")

newdata_future <- tibble(Year = (max(data$Year)+1):forecast_horizon, year_c = ((max(data$Year)+1):forecast_horizon) - min(data$Year))

brms_gam <- tryCatch(

brm(formula = LogRate ~ s(year_c, k = 8),

family = gaussian(),

data = data,

chains = brms_chains,

iter = brms_iter,

seed = 123,

control = list(adapt_delta = 0.95),

refresh = 0),

error = function(e) { message("brms fit failed: ", e$message); NULL }

)

if (!is.null(brms_gam)) {

pp_in <- posterior_predict(brms_gam) # draws x nobs on LogRate scale

brms_fitted_mean <- colMeans(exp(pp_in)) # back-transformed fitted mean (Rate scale)

pp_future <- posterior_predict(brms_gam, newdata = newdata_future)

brms_mean <- colMeans(exp(pp_future))

brms_lo <- apply(exp(pp_future), 2, quantile, 0.025)

brms_hi <- apply(exp(pp_future), 2, quantile, 0.975)

} else {

run_brms <- FALSE

}

}

# BSTS full-sample (if available)

fit_bsts <- NULL

bsts_insample_fitted_rate <- rep(NA_real_, n)

if (bsts_available) {

message("Fitting BSTS (may be slow)...")

ss <- list()

ss <- AddLocalLinearTrend(ss, y = ts_log_rate)

if (frequency_guess > 1) ss <- AddSeasonal(ss, y = ts_log_rate, nseasons = frequency_guess)

fit_bsts <- tryCatch(bsts(ts_log_rate, state.specification = ss, niter = 2000, ping = 0), error = function(e) { message("bsts fit failed: ", e$message); NULL })

if (!is.null(fit_bsts)) {

if (!is.null(fit_bsts$one.step.prediction.errors)) {

errs <- fit_bsts$one.step.prediction.errors

mean_err <- tryCatch(rowMeans(errs, na.rm = TRUE), error = function(e) rep(0, n))

fitted_log_bsts <- as.numeric(ts_log_rate) - mean_err

bsts_insample_fitted_rate <- exp(fitted_log_bsts)

message("BSTS in-sample fitted values obtained.")

} else {

message("BSTS fit present but no one.step.prediction.errors found; BSTS in-sample not available.")

}

}

}

# DLM full-sample (if available)

# robust extraction follows in safe_choose_dlm_fitted

dlm_insample_fitted_rate <- rep(NA_real_, n)

fc_dlm <- NULL

fit_dlm <- NULL

m_dlm <- NULL

filt <- NULL

if (dlm_available) {

message("Attempting full-sample DLM fit (dlm package)...")

build_dlm <- function(par) {

par <- pmax(par, -20) # bound to avoid collapse

dlmModPoly(order = 2, dV = exp(par[1]), dW = exp(par[2:3]))

}

init_par <- rep(log(var(as.numeric(ts_log_rate), na.rm = TRUE)/2), 3)

fit_dlm <- tryCatch(dlmMLE(as.numeric(ts_log_rate), parm = init_par, build = build_dlm), error = function(e) { message("dlmMLE failed: ", e$message); NULL })

if (!is.null(fit_dlm) && (is.null(fit_dlm$conv) || fit_dlm$conv == 0)) {

m_dlm <- tryCatch(build_dlm(fit_dlm$par), error = function(e) NULL)

if (!is.null(m_dlm)) {

filt <- tryCatch(dlmFilter(as.numeric(ts_log_rate), m_dlm), error = function(e) { message("dlmFilter failed: ", e$message); NULL })

# attempt extraction in safe chooser below

fc_dlm <- tryCatch(dlmForecast(filt, nAhead = (forecast_horizon - max(data$Year))), error = function(e) NULL)

}

} else {

message("DLM MLE did not converge or fit_dlm failed; skipping DLM full-sample forecasting.")

}

}

# -----------------------

# DLM post-fit diagnostics and robust in-sample fitted selection

# -----------------------

safe_choose_dlm_fitted <- function(filt, m_dlm, actuals_rate) {

n <- length(actuals_rate)

candidates <- list()

rmse_fun <- function(a,b) sqrt(mean((a-b)^2, na.rm = TRUE))

# 1) Direct one-step-ahead from filt$f

if (!is.null(filt) && !is.null(filt$f)) {

fitted1_log <- tryCatch(as.numeric(dropFirst(filt$f)), error = function(e) NULL)

if (!is.null(fitted1_log)) {

cand1 <- tryCatch(exp(head(fitted1_log, n)), error = function(e) rep(NA_real_, n))

candidates$no_varcorr <- list(x = cand1, desc = "exp(mu) from dropFirst(filt$f)")

}

}

# 2) Use observation predictive variance from filt$Q when present

if (!is.null(filt) && !is.null(filt$Q) && !is.null(filt$f)) {

qlist <- tryCatch(dropFirst(filt$Q), error = function(e) NULL)

fitted2_log <- tryCatch(as.numeric(dropFirst(filt$f)), error = function(e) NULL)

if (!is.null(qlist) && !is.null(fitted2_log)) {

fitted_var <- tryCatch(sapply(qlist, function(m) as.numeric(m[1,1])), error = function(e) rep(0, length(fitted2_log)))

fitted_var <- head(fitted_var, length(fitted2_log))

# cap variance to avoid explosive back-transform

cap_var <- pmin(fitted_var, 1.5)

cand2 <- tryCatch(exp(head(fitted2_log, n) + 0.5 * cap_var[1:n]), error = function(e) rep(NA_real_, n))

candidates$varcorr_capped <- list(x = cand2, desc = "exp(mu + 0.5*var) with capped var")

cand2_uncap <- tryCatch(exp(head(fitted2_log, n) + 0.5 * fitted_var[1:n]), error = function(e) rep(NA_real_, n))

candidates$varcorr_uncapped <- list(x = cand2_uncap, desc = "exp(mu + 0.5*var) uncapped")

}

}

# 3) Smoothed reconstruction via dlmSmooth

if (!is.null(filt) && !is.null(m_dlm)) {

smooth_obj <- tryCatch(dlmSmooth(filt), error = function(e) NULL)

if (!is.null(smooth_obj) && !is.null(smooth_obj$s)) {

s_mat <- tryCatch(dropFirst(smooth_obj$s), error = function(e) NULL)

if (!is.null(s_mat) && is.matrix(s_mat) && !is.null(m_dlm$FF)) {

recon <- tryCatch(as.numeric(t(m_dlm$FF %*% t(s_mat[1:n, , drop = FALSE]))), error = function(e) NULL)

if (!is.null(recon)) {

candidates$smooth_recon <- list(x = tryCatch(exp(recon), error = function(e) rep(NA_real_, n)), desc = "exp(FF %*% smoothed states)")

}

}

}

}

# score candidates by RMSE against actuals where available

results <- tibble(candidate = character(), desc = character(), RMSE = double(), n_valid = integer())

for (nm in names(candidates)) {

series <- candidates[[nm]]$x

valid_idx <- which(!is.na(series) & is.finite(series))

rmse_val <- if (length(valid_idx) > 0) rmse_fun(actuals_rate[valid_idx], series[valid_idx]) else NA_real_

results <- results %>% add_row(candidate = nm, desc = candidates[[nm]]$desc, RMSE = rmse_val, n_valid = length(valid_idx))

}

message("DLM candidate RMSEs (lower is better):")

print(results %>% arrange(RMSE))

if (nrow(results) == 0) stop("No DLM candidates available to choose.")

best_row <- results %>% filter(!is.na(RMSE) & is.finite(RMSE)) %>% arrange(RMSE) %>% slice(1)

best_name <- best_row$candidate[1]

best_series <- candidates[[best_name]]$x

attr(best_series, "chosen_desc") <- candidates[[best_name]]$desc

attr(best_series, "rmse_table") <- results

return(best_series)

}

# choose DLM fitted if possible

if (dlm_available && exists("filt") && exists("m_dlm")) {

chosen <- tryCatch(safe_choose_dlm_fitted(filt, m_dlm, actuals_rate), error = function(e) { message("DLM post-fit chooser failed: ", e$message); rep(NA_real_, n) })

dlm_insample_fitted_rate <- chosen

message("DLM chosen strategy: ", if(!is.null(attr(chosen, "chosen_desc"))) attr(chosen, "chosen_desc") else "none")

} else {

if (!dlm_available) message("DLM not available") else message("DLM filt/m_dlm not present; cannot produce DLM in-sample fitted values.")

}

# -----------------------

# Build fitted_list_rate for in-sample RMSE computations

# -----------------------

fitted_list_rate <- list()

# ARIMA fitted

if (!is.null(fit_arima)) {

fitted_arima_log <- tryCatch(as.numeric(fitted(fit_arima)), error = function(e) rep(NA_real_, n))

fitted_list_rate$ARIMA <- head(tryCatch(exp(fitted_arima_log), error = function(e) rep(NA_real_, n)), n)

} else fitted_list_rate$ARIMA <- rep(NA_real_, n)

# ETS fitted

if (!is.null(fit_ets)) {

fitted_ets_log <- tryCatch(as.numeric(fitted(fit_ets)), error = function(e) rep(NA_real_, n))

fitted_list_rate$ETS <- head(tryCatch(exp(fitted_ets_log), error = function(e) rep(NA_real_, n)), n)

} else fitted_list_rate$ETS <- rep(NA_real_, n)

# frequentist GAM fitted

if (!is.null(fit_gam)) {

fitted_gam_log <- tryCatch(as.numeric(predict(fit_gam, newdata = data)), error = function(e) rep(NA_real_, n))

fitted_list_rate$frequentist_GAM <- head(tryCatch(exp(fitted_gam_log), error = function(e) rep(NA_real_, n)), n)

} else fitted_list_rate$frequentist_GAM <- rep(NA_real_, n)

# bayesian GAM fitted

if (!is.null(brms_fitted_mean)) {

fitted_list_rate$bayesian_GAM <- head(as.numeric(brms_fitted_mean), n)

} else fitted_list_rate$bayesian_GAM <- rep(NA_real_, n)

# Theta in-sample via rolling one-step predictions (save log preds for residuals)

theta_in_rate <- rep(NA_real_, n)

theta_in_log <- rep(NA_real_, n)

if (!is.null(ts_log_rate)) {

for (t in 2:n) {

train_log_ts <- ts(as.numeric(ts_log_rate[1:(t-1)]), start = start_year, frequency = frequency_guess)

thf <- tryCatch(forecast::thetaf(train_log_ts, h = 1), error = function(e) NULL)

if (!is.null(thf)) {

theta_in_log[t] <- tryCatch(as.numeric(thf$mean[1]), error = function(e) NA_real_)

theta_in_rate[t] <- tryCatch(as.numeric(exp(thf$mean[1])), error = function(e) NA_real_)

}

}

}

fitted_list_rate$Theta <- theta_in_rate

# BSTS fitted

if (bsts_available && !is.null(fit_bsts) && exists("bsts_insample_fitted_rate")) {

fitted_list_rate$BSTS <- head(bsts_insample_fitted_rate, n)

} else fitted_list_rate$BSTS <- rep(NA_real_, n)

# DLM fitted

if (dlm_available && !all(is.na(dlm_insample_fitted_rate))) {

fitted_list_rate$DLM <- head(dlm_insample_fitted_rate, n)

} else fitted_list_rate$DLM <- rep(NA_real_, n)

# -----------------------

# In-sample RMSE (using fitted_list_rate)

# -----------------------

rmse_in_sample <- tibble(model = names(fitted_list_rate),

RMSE_in = sapply(fitted_list_rate, function(x) if (all(is.na(x))) NA_real_ else rmse_fun(actuals_rate, x)))

message("\n=== In-sample RMSE (using available fitted values) ===")

print(rmse_in_sample)

# -----------------------

# Forecasts (full-sample -> future)

# -----------------------

future_years <- (max(data$Year) + 1):forecast_horizon

h <- length(future_years)

forecast_df_list <- list()

# ARIMA

if (!is.null(fit_arima)) {

fc_arima <- tryCatch(forecast(fit_arima, h = h), error = function(e) NULL)

if (!is.null(fc_arima)) {

forecast_df_list <- append(forecast_df_list, list(

tibble(year = as.integer(future_years), model = "ARIMA",

mean = as.numeric(exp(fc_arima$mean)),

lower95 = if(!is.null(fc_arima$lower)) as.numeric(exp(fc_arima$lower[,ncol(fc_arima$lower)])) else NA_real_,

upper95 = if(!is.null(fc_arima$upper)) as.numeric(exp(fc_arima$upper[,ncol(fc_arima$upper)])) else NA_real_)

))

}

}

# ETS

if (!is.null(fit_ets)) {

fc_ets <- tryCatch(forecast(fit_ets, h = h), error = function(e) NULL)

if (!is.null(fc_ets)) {

forecast_df_list <- append(forecast_df_list, list(

tibble(year = as.integer(future_years), model = "ETS",

mean = as.numeric(exp(fc_ets$mean)),

lower95 = if(!is.null(fc_ets$lower)) as.numeric(exp(fc_ets$lower[,ncol(fc_ets$lower)])) else NA_real_,

upper95 = if(!is.null(fc_ets$upper)) as.numeric(exp(fc_ets$upper[,ncol(fc_ets$upper)])) else NA_real_)

))

}

}

# frequentist GAM

if (!is.null(fit_gam)) {

newdata_future_gam <- tibble(year_c = future_years - min(data$Year))

pred_gam_log <- tryCatch(predict(fit_gam, newdata = newdata_future_gam, se.fit = TRUE), error = function(e) NULL)

if (!is.null(pred_gam_log)) {

mean_gam_rate <- as.numeric(exp(pred_gam_log$fit))

gam_lo <- as.numeric(exp(pred_gam_log$fit - 1.96 * pred_gam_log$se.fit))

gam_hi <- as.numeric(exp(pred_gam_log$fit + 1.96 * pred_gam_log$se.fit))

forecast_df_list <- append(forecast_df_list, list(

tibble(year = as.integer(future_years), model = "frequentist_GAM",

mean = mean_gam_rate, lower95 = gam_lo, upper95 = gam_hi)

))

}

}

# bayesian GAM

if (run_brms && exists("brms_mean") && !is.null(brms_mean)) {

forecast_df_list <- append(forecast_df_list, list(

tibble(year = as.integer(future_years), model = "bayesian_GAM",

mean = as.numeric(brms_mean), lower95 = as.numeric(brms_lo), upper95 = as.numeric(brms_hi))

))

}

# Theta forecast (full-sample) with nonparametric centered residual bootstrap CI

fc_theta <- tryCatch(forecast::thetaf(ts_log_rate, h = h), error = function(e) NULL)

if (!is.null(fc_theta)) {

# point mean from exp(fc_theta$mean) retained for reference

theta_point_mean <- as.numeric(exp(fc_theta$mean))

# prepare residuals on log scale using in-sample one-step theta predictions

resid_log <- na.omit(data$LogRate - theta_in_log)

if (length(resid_log) < 2) {

message("Not enough in-sample theta residuals to construct bootstrap CI; Theta CI will be NA.")

theta_mean_rate <- theta_point_mean

theta_lower <- rep(NA_real_, h)

theta_upper <- rep(NA_real_, h)

draws_mat <- matrix(NA_real_, nrow = h, ncol = 0)

} else {

# center residuals to remove bias

resid_center <- resid_log - mean(resid_log)

set.seed(theta_boot_seed)

draws_mat <- matrix(NA_real_, nrow = h, ncol = theta_boot_B)

for (b in seq_len(theta_boot_B)) {

# resample centered residuals with replacement; length h

resampled <- sample(resid_center, size = h, replace = TRUE)

draws_log <- as.numeric(fc_theta$mean) + resampled

draws_mat[, b] <- exp(draws_log)

}

# use draws to get consistent predictive mean and empirical 95% CI

theta_mean_rate <- rowMeans(draws_mat, na.rm = TRUE)

theta_lower <- apply(draws_mat, 1, quantile, 0.025, na.rm = TRUE)

theta_upper <- apply(draws_mat, 1, quantile, 0.975, na.rm = TRUE)

message("Theta bootstrap draws: first-horizon mean=", round(theta_mean_rate[1],6),

", 2.5%=", round(theta_lower[1],6), ", 97.5%=", round(theta_upper[1],6))

}

forecast_df_list <- append(forecast_df_list, list(

tibble(year = as.integer(future_years), model = "Theta",

mean = theta_mean_rate, lower95 = theta_lower, upper95 = theta_upper)

))

}

# BSTS forecast

if (bsts_available && !is.null(fit_bsts)) {

pr <- tryCatch(predict(fit_bsts, horizon = h), error = function(e) NULL)

if (!is.null(pr)) {

mean_bsts <- as.numeric(exp(pr$mean))

lower_bsts <- if (!is.null(pr$interval)) as.numeric(exp(pr$interval[1,])) else NA_real_

upper_bsts <- if (!is.null(pr$interval)) as.numeric(exp(pr$interval[2,])) else NA_real_

forecast_df_list <- append(forecast_df_list, list(

tibble(year = as.integer(future_years), model = "BSTS",

mean = mean_bsts,

lower95 = if(length(lower_bsts)==length(mean_bsts)) lower_bsts else NA_real_,

upper95 = if(length(upper_bsts)==length(mean_bsts)) upper_bsts else NA_real_)

))

}

}

# DLM forecast

if (!is.null(fc_dlm)) {

mean_dlm_log <- tryCatch(as.numeric(fc_dlm$f), error = function(e) NULL)

variances <- tryCatch(sapply(fc_dlm$Q, function(x) as.numeric(x[1,1])), error = function(e) NULL)

if (!is.null(mean_dlm_log)) {

mean_dlm <- exp(mean_dlm_log + 0.5 * ifelse(is.null(variances), 0, variances))

sd_forecast <- if(!is.null(variances)) sqrt(variances) else rep(0, length(mean_dlm))

lower_dlm <- as.numeric(exp(mean_dlm_log - 1.96 * sd_forecast))

upper_dlm <- as.numeric(exp(mean_dlm_log + 1.96 * sd_forecast))

forecast_df_list <- append(forecast_df_list, list(

tibble(year = as.integer(future_years), model = "DLM",

mean = mean_dlm, lower95 = lower_dlm, upper95 = upper_dlm)

))

}

}

# bind forecasts & filter to models of interest

forecast_df_list <- forecast_df_list[!sapply(forecast_df_list, is.null)]

forecast_df <- bind_rows(forecast_df_list)

forecast_df <- forecast_df %>% filter(model %in% c("ARIMA","bayesian_GAM","Theta","DLM","ETS","frequentist_GAM","BSTS"))

# -----------------------

# Plot observed + forecasts combined and per model

# -----------------------

plot_all <- ggplot() +

geom_point(data = data, aes(x = Year, y = Rate)) +

geom_line(data = data, aes(x = Year, y = Rate)) +

geom_vline(xintercept = max(data$Year), linetype = "dashed") +

geom_line(data = forecast_df, aes(x = year, y = mean, color = model), size = 1) +

geom_point(data = forecast_df, aes(x = year, y = mean, color = model), size = 1.2) +

labs(title = "",

x = "Year", y = "Rate") +

scale_color_brewer(palette = "Set1") +

theme_minimal() + theme(legend.position = "bottom")

if (show_ci) {

ci_models <- forecast_df %>% filter(!is.na(lower95) & !is.na(upper95)) %>% pull(model) %>% unique()

for (m in ci_models) {

plot_all <- plot_all + geom_ribbon(data = filter(forecast_df, model == m),

aes(x = year, ymin = lower95, ymax = upper95, fill = model),

alpha = 0.12, inherit.aes = FALSE)

}

plot_all <- plot_all + guides(fill = "none")

}

plot_all

ggsave("S:/Shared With Me/Staff/SEER forecasting/plots/rate_models_forecast_comparison.png", plot_all, width = 12, height = 7)

message("Plot saved: rate_models_forecast_comparison.png")

# 3x3 grid with CI ribbons when available

if (!requireNamespace("gridExtra", quietly = TRUE)) install.packages("gridExtra")

library(gridExtra)

library(ggplot2)

models <- unique(forecast_df$model)

if (length(models) == 0) stop("forecast_df is empty. Run forecasting first.")

plot_for_model <- function(m) {

dfm <- filter(forecast_df, model == m) %>% arrange(year)

has_ci <- "lower95" %in% names(dfm) && "upper95" %in% names(dfm) &&

any(!is.na(dfm$lower95) & !is.na(dfm$upper95))

# choose a single color per panel

panel_col <- "#2171b5"

gg <- ggplot() +

# observed series

geom_line(data = data, aes(x = Year, y = Rate), size = 0.7, color = "black") +

geom_point(data = data, aes(x = Year, y = Rate), size = 1.2, color = "black") +

# ribbon first so it sits under the line/points

{ if (has_ci)

geom_ribbon(data = dfm, aes(x = year, ymin = lower95, ymax = upper95),

inherit.aes = FALSE, fill = panel_col, alpha = 0.16, na.rm = TRUE)

else NULL } +

# model forecast line and points

geom_line(data = dfm, aes(x = year, y = mean), size = 0.7, color = panel_col, na.rm = TRUE) +

geom_point(data = dfm, aes(x = year, y = mean), size = 1.2, color = panel_col, na.rm = TRUE) +

geom_vline(xintercept = max(data$Year), linetype = "dashed", size = 0.3) +

labs(title = m, x = NULL, y = NULL) +

theme_minimal(base_size = 11) +

theme(plot.title = element_text(size = 11, face = "bold"),

axis.text = element_text(size = 8),

axis.title = element_text(size = 9),

legend.position = "none")

gg

}

plots_all <- lapply(models, plot_for_model)

per_page <- 9

n_pages <- ceiling(length(plots_all) / per_page)

for (pg in seq_len(n_pages)) {

start_i <- (pg - 1) * per_page + 1

end_i <- min(pg * per_page, length(plots_all))

plots_page <- plots_all[start_i:end_i]

# fill empty slots with blank panels if needed

if (length(plots_page) < per_page) {

n_blank <- per_page - length(plots_page)

blank <- replicate(n_blank, ggplot() + theme_void(), simplify = FALSE)

plots_page <- c(plots_page, blank)

}

grid <- arrangeGrob(grobs = plots_page, ncol = 3, nrow = 3,

top = grid::textGrob(paste0(" "),

gp = grid::gpar(fontsize = 14, fontface = "bold")))

grid::grid.newpage()

grid::grid.draw(grid)

out_name <- paste0("models_grid_page", pg, ".png")

ggsave(out_name, grid, width = 12, height = 9, dpi = 200)

message("Saved: ", out_name)

}

----------------

# Rolling-origin backtest for all models and CRPS (CPSR) calculation

# -----------------------

#if (initial_window >= n) stop ("initial_window must be less than total observations.")

folds <- initial_window:(n-1)

models_to_eval <- c("ARIMA", "ETS", "frequentist_GAM", "Theta", "bayesian_GAM", "BSTS", "DLM")

models_to_eval <- unique(models_to_eval)

pred_matrix <- matrix(NA_real_, nrow = n, ncol = length(models_to_eval), dimnames = list(NULL, models_to_eval))

# store predictive mean on log scale and predictive sd on log scale where available

pred_log_mean <- matrix(NA_real_, nrow = n, ncol = length(models_to_eval), dimnames = list(NULL, models_to_eval))

pred_log_sd <- matrix(NA_real_, nrow = n, ncol = length(models_to_eval), dimnames = list(NULL, models_to_eval))

for (train_end in folds) {

test_idx <- train_end + 1

train_tbl <- data[1:train_end, ]

train_ts <- ts(as.numeric(train_tbl$LogRate), start = start_year, frequency = frequency_guess)

if (rolling_verbose) message("Rolling fold: train up to ", max(train_tbl$Year), " -> test ", data$Year[test_idx])

# ARIMA

arima_res <- tryCatch({ m <- auto.arima(train_ts, seasonal = (frequency_guess > 1)); fc <- forecast(m, h = 1); list(mean_log = as.numeric(fc$mean[1]), sd_log = if(!is.null(fc$upper)) as.numeric((fc$upper[1,ncol(fc$upper)] - fc$mean[1]) / 1.96) else NA_real_) }, error = function(e) NULL)

if (!is.null(arima_res)) { pred_log_mean[test_idx, "ARIMA"] <- arima_res$mean_log; pred_log_sd[test_idx, "ARIMA"] <- arima_res$sd_log; pred_matrix[test_idx, "ARIMA"] <- exp(arima_res$mean_log) }

# ETS

ets_res <- tryCatch({ m <- ets(train_ts); fc <- forecast(m, h = 1); list(mean_log = as.numeric(fc$mean[1]), sd_log = if(!is.null(fc$upper)) as.numeric((fc$upper[1,ncol(fc$upper)] - fc$mean[1]) / 1.96) else NA_real_) }, error = function(e) NULL)

if (!is.null(ets_res)) { pred_log_mean[test_idx, "ETS"] <- ets_res$mean_log; pred_log_sd[test_idx, "ETS"] <- ets_res$sd_log; pred_matrix[test_idx, "ETS"] <- exp(ets_res$mean_log) }

# frequentist GAM

gam_res <- tryCatch({ tr <- train_tbl %>% mutate(year_c = Year - min(data$Year)); m <- gam(LogRate ~ s(year_c, k = 8), data = tr, method = "REML"); newrow <- data[test_idx, ] %>% mutate(year_c = Year - min(data$Year)); pr <- predict(m, newdata = newrow, se.fit = TRUE); list(mean_log = as.numeric(pr$fit), sd_log = as.numeric(pr$se.fit)) }, error = function(e) NULL)

if (!is.null(gam_res)) { pred_log_mean[test_idx, "frequentist_GAM"] <- gam_res$mean_log; pred_log_sd[test_idx, "frequentist_GAM"] <- gam_res$sd_log; pred_matrix[test_idx, "frequentist_GAM"] <- exp(gam_res$mean_log) }

# Theta

theta_res <- tryCatch({ m <- tryCatch(forecast::thetaf(train_ts, h = 1), error = function(e) NULL); if(is.null(m)) NULL else list(mean_log = as.numeric(m$mean[1]), sd_log = NA_real_) }, error = function(e) NULL)

if (!is.null(theta_res)) { pred_log_mean[test_idx, "Theta"] <- theta_res$mean_log; pred_log_sd[test_idx, "Theta"] <- theta_res$sd_log; pred_matrix[test_idx, "Theta"] <- exp(theta_res$mean_log) }

# bayesian GAM rolling fit

if (run_brms && perform_heavy_rolling) {

brms_res <- tryCatch({ m <- brm(formula = LogRate ~ s(year_c, k = 8), family = gaussian(), data = train_tbl, chains = 2, iter = 800, seed = 123, control = list(adapt_delta = 0.9), refresh = 0); nd <- data[test_idx, , drop = FALSE]; pp <- posterior_predict(m, newdata = nd); list(mean_log = mean(pp), sd_log = sd(pp)) }, error = function(e) NULL)

if (!is.null(brms_res)) { pred_log_mean[test_idx, "bayesian_GAM"] <- brms_res$mean_log; pred_log_sd[test_idx, "bayesian_GAM"] <- brms_res$sd_log; pred_matrix[test_idx, "bayesian_GAM"] <- exp(brms_res$mean_log) }

}

# BSTS

if (bsts_available && perform_heavy_rolling) {

bsts_res <- tryCatch({ ss_local <- list(); ss_local <- AddLocalLinearTrend(ss_local, y = train_ts); if (frequency_guess > 1) ss_local <- AddSeasonal(ss_local, y = train_ts, nseasons = frequency_guess); m <- bsts(train_ts, state.specification = ss_local, niter = 1000, ping = 0); pr <- predict(m, horizon = 1); list(mean_log = as.numeric(pr$mean[1]), sd_log = if(!is.null(pr$sd)) as.numeric(pr$sd[1]) else NA_real_) }, error = function(e) NULL)

if (!is.null(bsts_res)) { pred_log_mean[test_idx, "BSTS"] <- bsts_res$mean_log; pred_log_sd[test_idx, "BSTS"] <- bsts_res$sd_log; pred_matrix[test_idx, "BSTS"] <- exp(bsts_res$mean_log) }

}

# DLM rolling-fit

if (dlm_available && perform_heavy_rolling) {

dlm_res <- tryCatch({ build_local <- function(par) dlmModPoly(order = 2, dV = exp(par[1]), dW = exp(par[2:3])); init_par_local <- rep(log(var(as.numeric(train_ts), na.rm = TRUE)/2), 3); fitd_local <- tryCatch(dlmMLE(as.numeric(train_ts), parm = init_par_local, build = build_local), error = function(e) NULL); if(!is.null(fitd_local) && (is.null(fitd_local$conv) || fitd_local$conv == 0)) { mloc <- build_local(fitd_local$par); filt_loc <- dlmFilter(as.numeric(train_ts), mloc); fc <- dlmForecast(filt_loc, nAhead = 1); list(mean_log = as.numeric(fc$f[1]), sd_log = tryCatch(as.numeric(fc$Q[[1]][1,1]), error = function(e) NA_real_)) } else NULL }, error = function(e) NULL)

if (!is.null(dlm_res)) { pred_log_mean[test_idx, "DLM"] <- dlm_res$mean_log; pred_log_sd[test_idx, "DLM"] <- dlm_res$sd_log; pred_matrix[test_idx, "DLM"] <- exp(dlm_res$mean_log) }

}

} # end rolling folds

# -----------------------

# Rolling-origin metrics: RMSE and CRPS (CPSR) using lognormal draws when sd available

# -----------------------

rmse_roll <- tibble(model = colnames(pred_matrix), RMSE_roll = NA_real_, n_valid = 0L)

crps_roll <- tibble(model = colnames(pred_matrix), CPSR = NA_real_, n_valid = 0L)

for (m in colnames(pred_matrix)) {

preds <- pred_matrix[, m]

valid_idx <- which(!is.na(preds))

n_valid <- length(valid_idx)

rmse_val <- if (n_valid > 0) rmse_fun(actuals_rate[valid_idx], preds[valid_idx]) else NA_real_

rmse_roll[rmse_roll$model == m, c("RMSE_roll", "n_valid")] <- list(rmse_val, n_valid)

# CRPS via sample approximation

crps_vals <- c()

if (n_valid > 0) {

for (i in valid_idx) {

mean_log <- pred_log_mean[i, m]

sd_log <- pred_log_sd[i, m]

obs <- actuals_rate[i]

if (!is.na(mean_log) && !is.na(sd_log) && sd_log > 0 && exists("rlnorm")) {

draws <- rlnorm(crps_draws, meanlog = mean_log, sdlog = sd_log)

crps_i <- tryCatch(crps_sample(y = obs, dat = draws), error = function(e) NA_real_)

} else if (!is.na(mean_log)) {

crps_i <- abs(obs - exp(mean_log))

} else crps_i <- NA_real_

crps_vals <- c(crps_vals, crps_i)

}

crps_mean <- mean(crps_vals, na.rm = TRUE)

} else crps_mean <- NA_real_

crps_roll[crps_roll$model == m, c("CPSR", "n_valid")] <- list(crps_mean, n_valid)

}

message("\n=== Rolling-origin (one-step-ahead) RMSE results ===")

print(rmse_roll %>% arrange(RMSE_roll))

message("\n=== Rolling-origin (one-step-ahead) CPSR (CRPS) results ===")

print(crps_roll %>% arrange(CPSR))

# Save rolling predictions & results

pred_df <- as_tibble(pred_matrix)

pred_df <- bind_cols(tibble(Year = data$Year), pred_df)

write_csv(pred_df, "rolling_one_step_predictions.csv")

write_csv(rmse_roll, "rolling_rmse_summary.csv")

write_csv(crps_roll, "crps_roll_summary.csv")

message("Saved: rolling_one_step_predictions.csv, rolling_rmse_summary.csv and crps_roll_summary.csv")

# -----------------------

# Combine & output final RMSE comparison (in-sample + rolling)

# -----------------------

in_sample_df <- rmse_in_sample %>% rename(RMSE_in = RMSE_in)

roll_df <- rmse_roll %>% rename(RMSE_roll = RMSE_roll)

combined <- full_join(in_sample_df %>% mutate(model = as.character(model)), roll_df %>% mutate(model = as.character(model)), by = "model") %>%

select(model, RMSE_in, RMSE_roll, n_valid) %>%

mutate(RMSE_in = as.numeric(RMSE_in), RMSE_roll = as.numeric(RMSE_roll), n_valid = ifelse(is.na(n_valid), 0L, as.integer(n_valid)), best_metric = case_when(!is.na(RMSE_roll) ~ RMSE_roll, !is.na(RMSE_in) ~ RMSE_in, TRUE ~ NA_real_)) %>%

arrange(best_metric) %>% mutate(rank = ifelse(!is.na(best_metric), rank(best_metric, ties.method = "min"), NA_integer_)) %>% select(rank, everything())

cat("\n=== RMSE comparison (In-sample vs Rolling one-step-ahead) ===\n")

print(combined)

readr::write_csv(combined, "rmse_comparison_all_models.csv")

message("Saved RMSE comparison: rmse_comparison_all_models.csv")
