# Supplementary material
Source: Research Square preprint supplement (doi:10.21203/rs.3.rs-9069493/v1)
Supplement: Supplementary file 2 [file d170d475f8b431ff4be6b848.docx]

**CANCER INCIDENCE FORECASTING**

Comprehensive Analysis Cheat Sheet

1. **DATA PREPARATION & PREPROCESSING**

**A1 Registry & Source Documentation**

- Record registry name, version, extraction date, and submission cutoff.
- State ICD-O-3 site and histology codes used for case identification.
- Define inclusion/exclusion criteria (malignancy behavior, age, follow-up).
- Log software version (e.g. SEER*Stat v9.x) and registry coverage (% US population).
- Archive a reproducible data ingestion script.

**A2 Rate Calculation & Age-Adjustment**

- Confirm age-standardization method and reference population; express rates per 100,000.
- Check denominator changes over time (population updates, registry expansion).
- Verify coding consistency across years (ICD revisions, registry rule changes).

**A3 Temporal & Aggregation Decisions**

- State aggregation frequency (annual / quarterly / monthly) with rationale.
- Confirm study period start/end dates and flag any years with registry irregularities.

**A4 Transformation**

- Apply variance-stabilizing transformation if needed.

*Log-transform recommended for declining rates with heteroscedasticity. Record inverse formula and bias correction: E[Y] = exp (μ + 0.5σ²).*

- For Bayesian/simulation models: back-transform by exponentiating posterior draws, not exp (log-scale mean).

**A5 Missing Data & Sparsity**

- Assess sparsity and suppressed cells, document imputation or exclusion rules.

1. **EXPLORATORY & DIAGNOSTIC ANALYSIS**

**B1 Trend & Stationarity**

- Visualize raw and log-transformed series with trend overlay.
- Run ADF test (H₀: unit root) and KPSS test (H₀: stationary); report test statistics and p-values.
- If ADF and KPSS conflict, treat series as non-stationary.
- Check for structural breaks / changepoints; document candidate years.

**B2 Autocorrelation Structure**

- Compute and inspect ACF and PACF; save plots with interpretation notes.
- Document lag order implied by ACF/PACF diagnostics.

**B3 Seasonality Detection**

- Run spectral analysis / periodogram on log-transformed series.
- Inspect ACF at seasonal lags (lag 4 for quarterly, lag 12 for monthly).
- Annual data: note explicitly that sub-annual seasonality cannot be assessed.
- If significant periodicity detected: add SARIMA or TBATS to candidate set; otherwise, document exclusion.

**B5 Nonlinearity & Structural Change**

- Visually inspect for nonlinear inflections; include decomposition plot (trend + residual).
- Assess whether the rate of decline is accelerating, stable, or reversing over sub-periods.

**C. FORECASTING OBJECTIVE**

**C1 Forecast Horizon**

- Short-term (1- 5 yr): primary metric = rolling-origin RMSE; secondary = CRPS.
- Long-term (5- 15+ yr): primary metric = CRPS; secondary = RMSE. State-space / Bayesian models strongly recommended.

*Choose the primary evaluation metric BEFORE model fitting. Post-hoc metric selection biases model choice.*

**C2 Intended Use**

- Surveillance / incidence monitoring → prioritize point accuracy, narrow near-term intervals.
- Workforce / infrastructure planning → scenario-based range; emphasize lower-bound risks.
- Clinical trial feasibility → emphasize interval width and lower-bound distribution.
- Commercial forecasting → full predictive distribution; interval width drives supply/market decisions.
- Policy / public health → at least two plausible trajectory scenarios.

**D. MODEL CANDIDATE SET**

**D1 Classical Benchmarks (Always Run)**

- ARIMA(p,d,q): specify orders from ACF/PACF; document any pre-transformation; obtain analytic prediction intervals.
- ETS: document error / trend / seasonal type; note that ETS and ARIMA typically converge in mean trajectory.
- Theta: useful fast benchmark; analytic CIs unavailable - use bootstrap ≥ 2,000 draws.

**D2 Seasonal Extensions (Only if Seasonality Detected in B4)**

- SARIMA: add seasonal AR, MA, and differencing terms.
- TBATS: for complex or multiple seasonality patterns.
- If no seasonal signal (typical for annual series): document exclusion explicitly.

**D3 Semi-Parametric Models**

- Frequentist/Bayesian GAM: Capture smooth nonlinear trends using penalized splines; use REML/GCV for frequentist estimation or posterior inference for Bayesian uncertainty propagation.
- DLM/BSTS: State-space models that allow evolving trends and structural changes with probabilistic forecasts via Kalman filtering or Bayesian inference. Recommended if structural change is plausible

**D4 Hierarchical / Subgroup Models (If Stratified Analysis Planned)**

- If forecasting by sex, age group, race, or stage: use hierarchical / multilevel models that borrow strength across strata rather than fitting independent models.

**D5 Model Specification Documentation**

- For every model: record all hyperparameters, transformation, software package and version.
- For Bayesian models: record seed, chains, iterations, warmup, R-hat, and ESS.
- For bootstrap intervals: record number of draws (≥ 2,000).
- Archive all model objects, posterior draws, and fitted values.

**E. EVALUATION & VALIDATION**

**E1 Rolling-Origin Cross-Validation**

- Use rolling-origin CV (not a single train-test split); initial training window ≥ 10 years.
- Roll forward one step at a time, re-estimating the model at each origin; record all forecast errors.

**E2 Multi-Step-Ahead Evaluation**

- Evaluate direct multi-step and recursive multi-step forecasting strategies for horizons > 5 years.

**E3 Point Accuracy - Rolling-Origin RMSE**

- Compute rolling-origin RMSE from one-step-ahead predictions (after 10-year burn-in).
- Report in-sample RMSE separately (reference only - not used for model ranking).

**E4 Probabilistic Calibration - CRPS**

- Compute CRPS for all models with predictive distributions.

*CRPS evaluates the full predictive CDF; penalizes overconfident and overdispersed intervals equally. Lower = better.* *N*ever *use RMSE alone for long-horizon comparisons.*

**E5 Interval Calibration**

- Evaluate empirical 50% and 95% prediction interval coverage (hit rates).
- Compare 95% CI widths across all models at horizons: 1, 3, 5, 10, 15 years.
- Flag models with implausibly narrow intervals (overconfidence) or very wide short-horizon intervals (over-parameterization).

**E6 Model Selection Decision Rule**

| Scenario | Primary Metric | Secondary | Preferred Model Class |
| --- | --- | --- | --- |
| Short horizon (1- 5 yr) | Rolling-origin RMSE | CRPS | ARIMA / ETS / DLM |
| Long horizon (5- 15+ yr) | CRPS | RMSE + CI width | BSTS / Bayesian GAM |

*Short horizon decisions are sensitive to central estimates. RMSE directly measures that.* *In long-horizon contexts, uncertainty calibration is more decision-relevant than marginal point accuracy differences*

**E7 Residual Diagnostics & Sensitivity**

- ACF/PACF of residuals, normality checks.
- Sensitivity analysis: vary training window ±2- 3 years; report impact on RMSE and CRPS.
- For Bayesian models: prior sensitivity (tighten/loosen key priors by one order of magnitude).
- For count models: test overdispersion assumption (Poisson vs negative-binomial).

**F. FORECASTING & UNCERTAINTY QUANTIFICATION**

**F1 Point Forecasts**

- Produce forecasts on the log scale; back-transform with bias correction: E[Y] = exp (μ + 0.5σ²).
- For Bayesian/simulation models: exponentiate posterior draws; compute mean and intervals on original scale.
- Report at horizons: 1, 3, 5, 10, and 15 years minimum.

**F2 Predictive Intervals**

- Report 50% and 95% prediction/credible intervals for all models at all horizons.
- Compare 95% CI widths across models explicitly (report in per-100,000 units).
- Document interval generation method: analytical / bootstrap (n draws) / posterior predictive.

**F3 Population-to-Count Translation**

- Translate forecast rates to expected case counts for operational planning.

*Propagate rate uncertainty through population projections - population projections carry their own uncertainty especially at 15-year horizons. Do not treat projected population as fixed.*

**F4 Scenario-Based & Ensemble Forecasting**

- For long-horizon planning: produce optimistic / central / pessimistic trajectory scenarios.
- If multiple models perform comparably: consider ensemble (equal-weight or CRPS-weighted).
- Report range of endpoint-year projections across all models to make model uncertainty visible.
- For declining indications: explicitly report lower-bound scenario and implications for patient availability.

**G. REPORTING & VISUALIZATION**

**G1 Figures**

- Main figure: observed data + all model forecasts overlaid with shaded 95% prediction intervals.
- Separate panels or distinguishable line styles per model; numeric rate labels at key years.
- Composite diagnostic figure: ACF / PACF / spectral plots with labelled axes and significance bounds.

**G2 Performance Tables**

- Table: in-sample RMSE, rolling-origin RMSE, CRPS, 95% CI widths at 1, 5, 15-year horizons.
- Document which metric drove final model selection.
- Supplementary table: model characteristics (trend handling, uncertainty type, assumptions).

**G3 Reporting Standards**

- State forecasting objective and intended audience explicitly in the methods section.
- Present 95% prediction intervals in all figures and tables - never point forecasts alone.
- Provide sensitivity and scenario appendices (if conducted).
- Report on whether projected counts translate into operational constraints (e.g. trial enrolment shortfalls).

**H. PRACTICAL GUIDANCE FOR DECISION-MAKERS**

- Document which country / region the forecast applies to; note that method choice is shaped by healthcare infrastructure, reimbursement, and regulatory environment.
- For declining indications: emphasize lower-bound risks for capacity planning and commercial projections.
- Recommend contingency planning when model projections diverge by > 10% in absolute rate at the planning horizon.
- Stress-test commercial projections under both favorable and unfavorable incidence scenarios.
- When model intervals diverge substantially, present ranges to stakeholders rather than single-point values.
- Plan for regular forecast updates as new data releases become available.

*Communicate uncertainty to non-technical stakeholders using scenario narratives and visual fan charts rather than statistical metrics alone.*

**I. REPRODUCIBILITY & GOVERNANCE**

- Provide fully runnable code with README covering: data ingestion, model fitting, rolling-origin CV, CRPS, back-transformation, and plotting.
- Pre-register analysis plan (or document as pre-specified) before model fitting begins.
- Version-control dataset snapshots and code via git tag or DOI.
- Record software versions and random seeds for all stochastic elements (e.g. R 4.4.x, brms 2.x, set.seed(123)).
- Create model registry entry: model_id, version, author, date, git hash/DOI, and changelog summary.
- Record stakeholder sign-off for forecasts used in operational or commercial decisions.
- Archive model objects, posterior draws, and all validation outputs.
- Document any deviations from the pre-specified analysis plan.

**J. LIMITATIONS & ASSUMPTIONS**

**J1 Model Assumptions**

- State assumptions about stationarity, trend persistence, and absence of structural breaks.
- For univariate models: note that structural drivers (screening, treatment, demographics) are not modelled.
- State that no single model is sufficient for long-range planning; optimal model depends on objective.

**J2 Data Limitations**

- Report registry coverage limitations (% population, geographic scope).
- Document coding changes (ICD revision, histology reclassification) affecting time-series comparability.
- For stratified analyses: document data sparsity by subgroup, stage, or demographic.

**J3 Sensitivity & Uncertainty**

- Report sensitivity to priors, smoothing parameters, training window, and change points.
- If models differ by > 15% on endpoint projected rate, report the range explicitly.
- Recommend regular model re-fitting as new data becomes available.

**K. COVARIATE ADJUSTMENT [OPTIONAL - Complete A- J First]**

*Keep the unconditional univariate forecast as the primary result. Covariate-adjusted models are secondary / scenario outputs. Use this section only when time-varying covariates (smoking prevalence, age distribution, screening rates, policy indicators) are reported.*

**K1 Preconditions - All Must Be Met**

- Historical covariate data available for the full modelling period (2000 - present) or longer.
- External covariate projections or plausible scenarios available for the full forecast horizon.
- Empirical test confirms covariate adds predictive value over the baseline univariate model.

*Report partial R², delta RMSE, delta CRPS, or AIC/BIC improvement. Default threshold: < 5% RMSE reduction → retain unconditional model as primary. Threshold may be adapted based on domain tolerance; document chosen threshold.*

- For N < 30 annual observations: restrict covariate functional complexity to linear term or low-df spline (k ≤ 3).
- Pre-specify whether model is predictive or causal; if causal, document identification assumptions.

**K2 Candidate Covariate Selection & Preprocessing**

- List all candidate covariates with biological / epidemiological rationale. Conduct a rapid review to identify prognostic factors associated with the disease area*.*
- Decide lag structure upfront; justify biologically plausible lag window (e.g. smoking lag 5- 15 yr for SCLC).
- Align covariates to the same calendar units as outcome, document interpolation for missing years.
- Standardize all covariates; record scaling method (z-score / min-max / none).
- Assess collinearity (VIF or pairwise correlation matrix); document action for collinear predictors (PCA, pooling, or principled exclusion).
- Document source, version, and access date for every covariate dataset.

**K3 Model Specification with Covariates**

- Count data: Poisson or negative-binomial regression with offset = log(population).
- Rate data: GAM or Bayesian GAM with covariate smooth terms (low-k).
- For GAMs: run mgcv::concurvity() - values > 0.8 indicate problematic concavity; simplify or pool predictors.
- For Bayesian models: document weakly informative priors on covariate coefficients (Student-t(3, 0, 2.5)); run prior predictive checks before fitting.
- For BSTS: apply spike-and-slab variable selection; report posterior inclusion probabilities per covariate.
- Formally diagnose overdispersion (deviance/df >> 1 → prefer negative-binomial).

**K4 Covariate Forecast Scenarios & Uncertainty Propagation**

- Define ≥ 3 covariate projection scenarios: central / optimistic / pessimistic.
- Source each scenario from a published projection or expert elicitation; archive source and access date.
- Propagate covariate uncertainty into outcome intervals: joint modelling (Option A) or simulation ≥ 1,000 paths (Option B).

**K5 Evaluation Against Unconditional Baseline**

- Run unconditional baseline (Sections D- E) alongside all covariate-adjusted models.
- Tabulate delta RMSE and delta CRPS; if both < 5%, retain unconditional model as primary.
- Sensitivity analysis: re-run with/without each covariate individually; report marginal accuracy impact.
- For BSTS: report which covariates achieved posterior inclusion probability > 0.5 and summarize marginal effects.

**K6 Reporting Requirements**

- Present conditional and unconditional forecasts in separate, clearly labelled panels or table columns.
- Label every conditional forecast with its explicit covariate-path assumption.
- Include partial-effect plots for key covariates with 95% CIs in a supplementary figure.
- Include performance comparison table: unconditional vs covariate-adjusted RMSE, CRPS, 95% CI width at 1, 5, 15-year horizons.
- Include covariate uncertainty table: per-horizon variance decomposition.
