# Supplementary material
Source: Research Square preprint supplement (doi:10.21203/rs.3.rs-9069493/v1)
Supplement: Supplementary file 3 [file f4e7a303cc7801d36f3e7ce6.docx]

# Supp Table 1: Comprehensive Forecasting Methods Comparison

This table compares core features, assumptions, strengths, and popular implementations for common forecasting methods.

| **Feature / Method** | **ARIMA** | **ETS** | **Theta** | **Frequentist GAM** | **Bayesian GAM** | **BSTS (Bayesian Structural TS)** | **DLM (Dynamic Linear Model)** |
| --- | --- | --- | --- | --- | --- | --- | --- |
| Trend handling | Yes, via differencing and AR/MA terms. | Yes, explicit trend components. | Yes, via decomposition. | Yes, with smoothers. | Yes, with smoothers and priors. | Yes, explicit latent trend states. | Yes, trend as latent state. |
| Seasonality (single) | Yes, via SARIMA or Fourier terms. | Yes, native seasonal components. | Limited simple seasonal adjustments only. | Yes, cyclic splines. | Yes, cyclic splines with posterior uncertainty. | Yes, seasonal state components. | Yes, seasonal latent states. |
| Multiple seasonality | Partial requires Fourier or TBATS-style extensions. | Partial core ETS limited TBATS extends support. | No. | Yes, multiple cyclic splines. | Yes, multiple cyclic splines. | Needs explicit components per period. | Yes, by adding seasonal states design required. |
| Seasonality type | Diff-based or Fourier; multiplicative or additive via model choice. | Additive or multiplicative variants supported. | Additive style decomposition. | Flexible seasonal shapes via splines. | Flexible seasonal shapes via splines. | Additive seasonal states. | Additive seasonal latent structure. |
| Nonlinear trends | No. | No smoothing but not flexible nonlinear covariates. | No. | Yes. | Yes. | Limited mainly linear states but can include regressors. | Limited unless extended. |
| Exogenous regressors / interventions | Yes | Limited not standard. | No. | Yes straightforward. | Yes, straightforward with priors. | Yes, designed to include regressors and spike-slab selection. | Yes, regression in state or observation equation. |
| Non-Gaussian / count data support | Mostly Gaussian residuals extensions exist but not native. | Mostly Gaussian assumptions. | Not designed for counts. | Yes, supports Poisson, negative binomial families. | Yes, supports any likelihood through Bayesian model. | Typically, Gaussian observation model non-Gaussian needs custom work. | Standard is Gaussian can be extended with more work. |
| Probabilistic forecasts | Approximate forecast intervals analytic or bootstrap. | Approximate forecast intervals. | Approximate intervals from decomposition. | Asymptotic prediction intervals or bootstrap. | Full posterior predictive distribution. | Full Bayesian posterior predictive distribution. | Predictive distribution from Kalman filter Bayesian DLM gives posterior samples. |
| Uncertainty quantification detail | CIs from asymptotic approx. formula or bootstrap. | CIs from model residual assumptions. | CIs approximate. | Asymptotic CIs bootstrap recommended. | Credible intervals and posterior predictive checks. | Credible intervals posterior predictive checks model averaging. | Analytical predictive variance Bayesian sampling yields full posterior. |
| Missing data handling | Weak standard ARIMA needs regular data state-space variants handle missingness better. | Weak in base ETS imputations are often used. | Poor. | Partial depends on implementation and covariate design. | Good Bayesian inference tolerates missingness via data augmentation. | Good Kalman-based inference handles intermittent missing values naturally. | Good Kalman filter handles missing observations naturally. |
| Irregular time spacing | Poor expects regular spacing. | Poor expects regular spacing. | Poor. | Better regression framework tolerates irregular times. | Better regression likelihood handles irregular spacing. | Limited state-space prefers regular but can be adapted. | Limited but adaptable design required. |
| Interpretability | Moderate AR and MA parameters interpretable. | High separate error trend seasonality. | High simple decomposition. | High for smooth term effects and covariates. | Moderate-high priors and posteriors aid interpretation. | High components have direct meaning. | High state interpretation is clear. |
| Scalability with long series | Scales well. | Scales well. | Scales very well. | Moderate spline basis size matters. | High computational cost / slow for long series | High computational cost / slow for long series | Scales depending on state size Kalman is linear in time. |
| Robustness to structural breaks | Moderate needs re-specification or regime models. | Low to moderate. | Moderately robust as a simple benchmark. | It depends on spline flexibility and data. | Good if priors encode regime expectations. | Good structural change can be modeled explicitly. | Good if states capture regime shifts. |
| Suitability for small samples | Moderate needs several observations. | Moderate. | Good benchmark for small samples. | Requires enough data to fit smoothers. | Good priors help with small data. | Reasonable with informative priors. | Reasonable state dimension matters. |

Abbreviation: ARIMA, Autoregressive Integrated Moving Average; ETS, Error Trend Seasonality (Exponential Smoothing); Theta, Theta Method; GAM, Generalized Additive Model; BSTS, Bayesian Structural Time Series; DLM, Dynamic Linear Model; SARIMA, Seasonal Autoregressive Integrated Moving Average; CI, Confidence Interval; CrI, Credible
